# Supplementary material for: One-pot synthesis of porous nickel cobalt sulphides: tuning the composition for superior pseudocapacitance
Source: Royal Society of Chemistry journal article supplement (doi:10.1039/c4ta04420g), 2014-10-07
Supplement: c4ta04420g1.pdf [file c4ta04420g1.pdf]

## Electronic Supplementary Information

### One-Pot Synthesis of Porous Nickel Cobalt Sulphides: Tuning the Composition for Superior Pseudocapacitance

Haichao Chen,<sup>ab</sup> Jianjun Jiang,<sup>\*a</sup> Yuandong Zhao,<sup>a</sup> Li Zhang,<sup>a</sup> Danqing Guo<sup>a</sup> and Dandan Xia<sup>a</sup>

<sup>a</sup> School of Optical and Electronic Information, Huazhong University of Science and Technology (HUST), Wuhan 430074, China.

<sup>b</sup> College of Materials Science & Engineering, China Jiliang University, Hangzhou 310018, China.

\*E-mail: jiangjj@mail.hust.edu.cn (Prof. Jianjun Jiang)

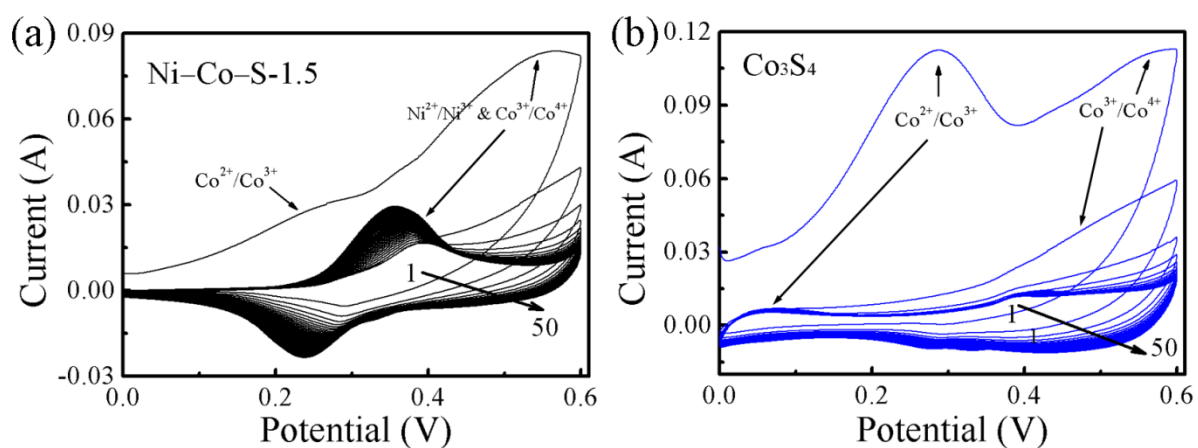

**Fig. S1** The first 50 CV cycles of the (a) Ni-Co-S-1.5 and (b)  $\text{Co}_3\text{S}_4$ . Both of the samples are tested using a fresh electrode, respectively.
